# Supplementary material for: Coaxial Electrospun Nanofibrous Membranes for Enhanced Water Recovery by Direct Contact Membrane Distillation
Source: MDPI journal article supplement (doi:10.3390/polym14245350), 2022-12-07
Supplement: s1 [file s1]

**Coaxial Electrospun Nanofibrous Membranes for Enhanced Water Recovery by Direct  
Contact Membrane Distillation**

**Vivekanandan Sangeetha<sup>a</sup>, Noel Jacob Kaleekkal<sup>a\*</sup>, Saravanamuthu Vigneswaran<sup>b,c\*</sup>**

<sup>a</sup> *Membrane Separation Group, Department of Chemical Engineering, National Institute of  
Technology Calicut, Kozhikode, Kerala – 673601, India.*

<sup>b</sup> *Centre for Technology in Water and Wastewater, School of Civil and Environmental  
Engineering, University of Technology Sydney, Sydney, NSW 2007, Australia.*

<sup>c</sup> *Faculty of Sciences & Technology (RealTek), Norwegian University of Life Sciences, P.O.  
Box 5003, NO-1432 Ås, Norway*

*E-mail: Saravanamuth.Vigneswaran@uts.edu.au*

**Table S1. Properties of the different surfactants**

| Surfactant                       | Molecular Formula                                  | Chemical Structure                                                                  | Molecular Weight, g.mol <sup>-1</sup> | Surfactant Charge | Hydrophilic-Lipophilic Balance (HLB) Value | Critical Micelle Concentration (CMC) value | Reference |
|----------------------------------|----------------------------------------------------|-------------------------------------------------------------------------------------|---------------------------------------|-------------------|--------------------------------------------|--------------------------------------------|-----------|
| Cetyl Triammonium Bromide (CTAB) | C <sub>19</sub> H <sub>42</sub> NBr                | 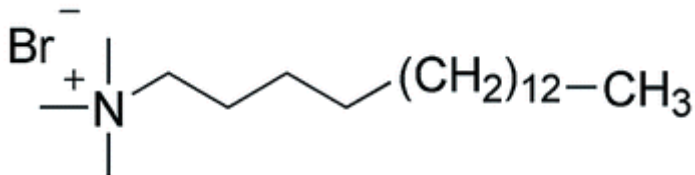  | 364.46                                | Cationic          | 15                                         | 0.9 mM                                     | [6, 44]   |
| Sodium Dodecyl Sulphate (SDS)    | C <sub>12</sub> H <sub>25</sub> SO <sub>4</sub> Na |   | 288.38                                | Anionic           | 40                                         | 8 mM                                       | [6]       |
| Tween - 80                       | C <sub>64</sub> H <sub>124</sub> O <sub>26</sub>   |  | 1310                                  | Non-ionic         | 15                                         | 0.106 mM                                   | [45]      |

**Table S2. Elemental Composition of Membrane M4S**

| Element | Line Type | Apparent Concentration | k Ratio | Wt%    | Wt% Sigma | Atomic % | Standard Label                 |
|---------|-----------|------------------------|---------|--------|-----------|----------|--------------------------------|
| C       | K series  | 3.73                   | 0.03725 | 37.95  | 0.44      | 49.11    | C Vit                          |
| O       | K series  | 0.22                   | 0.00073 | 0.85   | 0.19      | 0.82     | SiO <sub>2</sub>               |
| F       | K series  | 33.86                  | 0.06649 | 61.18  | 0.45      | 50.06    | CaF <sub>2</sub>               |
| Al      | K series  | 0.00                   | 0.00002 | 0.02   | 0.10      | 0.01     | Al <sub>2</sub> O <sub>3</sub> |
| Total:  |           |                        |         | 100.00 |           | 100.00   |                                |

**Table S3. Contact angle of M4S with different feed solutions and surface tension of different feed solutions on the membrane surface (M<sub>4s</sub>)**

| Sl. No | Sample                       | Solution Contact Angle (initial)                                 | Solution contact angle ( t = 10 min) | Solution Surface Tension (mN/m) |
|--------|------------------------------|------------------------------------------------------------------|--------------------------------------|---------------------------------|
| 1      | DI Water                     |                                                                  |                                      | 71.82                           |
| 2      | 0.6 mM CTAB                  | 135.40                                                           | 132.20                               | 34.81                           |
| 3      | 0.9 mM CTAB                  | 129.80                                                           | 123.6                                | 32.17                           |
| 4      | 1.8 mM CTAB                  | 123.20                                                           | 117.30                               | 33.19                           |
| 5      | 0.6 mM CTAB + 3.5 wt. % NaCl | 122.20                                                           | 118.40                               | 33.40                           |
| 6      | 0.9 mM CTAB + 3.5 wt. % NaCl | 119.40                                                           | 115.20                               | 32.01                           |
| 7      | 1.8 mM CTAB + 3.5 wt. % NaCl | 119.20                                                           | 102.40                               | 33.94                           |
| 8      | 4 mM SDS                     | 123.00                                                           | 120.00                               | 36.11                           |
| 9      | 8 mM SDS                     | 120.8                                                            | 118.20                               | 34.99                           |
| 10     | 16 mM SDS                    | The drop could not be stabilized to drop on the membrane surface |                                      | 32.40                           |
| 11     | 4 mM SDS + 3.5 wt. % NaCl    |                                                                  |                                      | 32.57                           |

|    |                                    |        |        |       |
|----|------------------------------------|--------|--------|-------|
| 12 | 8 mM SDS + 3.5 wt. % NaCl          |        |        | 30.29 |
| 13 | 16 mM SDS + 3.5 wt. % NaCl         |        |        | 30.42 |
| 14 | 0.053 mM Tween 80                  | 127.6  | 125.40 | 39.66 |
| 15 | 0.106 mM Tween 80                  | 133.5  | 130.4  | 40.20 |
| 16 | 0.053 mM Tween 80 + 3.5 wt. % NaCl | 125.30 | 119.20 | 41.62 |
| 17 | 0.106 mM Tween 80 + 3.5 wt. % NaCl | 127.6  | 124.90 | 40.08 |
